# Supplementary material
Source: HighWire-hosted journal article supplement (https://bjsm.bmj.com/content/53/8/495)
Supplement: inline-supplementary-material-1 [file inline-supplementary-material-1.docx]

|  | Number of Concussions Typically Managed | | |  |  |
| --- | --- | --- | --- | --- | --- |
| Question: | 1-2 per month  n (%) | 1-2 per week  n (%) | >2 per week  n (%) | Total  n (%) | Fisher’s Exact test  (P =) |
| Do you think it is necessary to withhold an athlete experiencing symptoms of a concussion from driving? |  |  |  |  | .010 |
| Almost Always | 28 (26.4) | 20 (21.1) | 18 (14.4) | 66 (20.3) |  |
| Usually | 29 (27.4) | 28 (29.5) | 39 (31.2) | 96 (29.5) |  |
| Sometimes | 40 (37.7) | 45 (47.4) | 67 (53.6) | 152 (46.6) |  |
| Almost Never | 9 (8.5) | 2 (2.1) | 1 (.8) | 12 (3.7) |  |
|  |  |  |  |  |  |
| Do you allow athletes who are still experiencing symptoms of a concussion to drive home following their clinic visit? |  |  |  |  | .001 |
| Almost Always | 13 (12.3) | 13 (14.0) | 4 (3.2) | 30 (9.2) |  |
| Usually | 22 (20.8) | 17 (18.3) | 21 (16.7) | 60 (18.5) |  |
| Sometimes | 35 (33.0) | 41 (44.1) | 74 (58.7) | 150 (46.2) |  |
| Almost Never | 36 (34.0) | 22 (23.7) | 27 (21.4) | 85 (26.2) |  |
|  |  |  |  |  |  |
| Do you counsel athletes regarding text messaging and screen use (television, computer, etc.)? |  |  |  |  | .109 |
| Almost Always | 93 (87.7) | 84 (88.4) | 104 (82.5) | 281 (85.9) |  |
| Usually | 10 (9.4) | 9 (9.5) | 13 (10.3) | 32 (9.8) |  |
| Sometimes | 1 (.9) | 2 (2.1) | 9 (7.1) | 12 (3.7) |  |
| Almost Never | 2 (1.9) | 0 (0.0) | 0 (0.0) | 2 (.6) |  |
|  |  |  |  |  |  |
| Regarding athletes who drive, do you counsel them about driving following their concussion? |  |  |  |  | .040 |
| Almost Always | 50 (47.2) | 51 (54.3) | 66 (52.4) | 167 (51.2) |  |
| Usually | 23 (21.7) | 22 (23.4) | 37 (29.4) | 82 (25.2) |  |
| Sometimes | 18 (17.0) | 16 (17.0) | 20 (15.9) | 54 (16.6) |  |
| Almost Never | 15 (14.2) | 5 (5.3) | 3 (2.4) | 23 (7.1) |  |
|  |  |  |  |  |  |
| Have you ever arranged for transportation for a concussed athlete to get home from your clinic? |  |  |  |  | .038 |
| Yes | 27 (25.5) | 40 (42.1) | 39 (31.0) | 106 (32.4) |  |
| No | 79 (74.5) | 55 (57.9) | 87 (69.1) | 221 (67.6) |  |
|  |  |  |  |  |  |
| Do you implement testing to determine whether an athlete is safe to return to driving? |  |  |  |  | .026 |
| Yes | 12 (11.5) | 12 (12.6) | 30 (23.8) | 54 (16.6) |  |
| No | 92 (88.5) | 83 (87.4) | 96 (76.2) | 271 (83.4) |  |
|  |  |  |  |  |  |
| Do you feel athletes who have sustained a concussion are at an increased risk of a motor vehicle accident? |  |  |  |  | .369 |
| Yes | 95 (91.4) | 77 (85.6) | 109 (86.5) | 281 (87.8) |  |
| No | 9 (8.7) | 13 (14.4) | 17 (13.5) | 39 (12.2) |  |
|  |  |  |  |  |  |

Note: Percentages may add to greater than 100% due to rounding.
